RESEARCH ARTICLE

# A 30-year analysis of urolithiasis burden in the North Africa and Middle East region: Findings from the global burden of disease study 2021

Sina Golestani<sup>1</sup>, Mohammad Taghi Talebian<sup>2</sup>, Ali Golestani<sup>1</sup>, Zeinab Ahadi<sup>3</sup>, Ozra Tabatabaei-Malazy<sup>1</sup>, Ziba Aghsaei Fard<sup>3</sup>, Abdolreza Mohammadi<sup>3</sup>, Bagher Larijani<sup>4</sup>, Seyed Mohammad Kazem Aghamir<sup>3\*</sup>

**1** Non-Communicable Diseases Research Center, Endocrinology and Metabolism Population Sciences Institute, Tehran University of Medical Sciences, Tehran, Iran, **2** Sina Hosspital, Tehran University of Medical Sciences, Tehran, Iran, **3** Urology Research Center, Tehran University of Medical Sciences, Tehran, Iran, **4** Endocrinology and Metabolism Research Center, Endocrinology and Metabolism Clinical Sciences Institute, Tehran University of Medical Sciences, Tehran, Iran

\* [mkaghamir@tums.ac.ir](mailto:mkaghamir@tums.ac.ir)

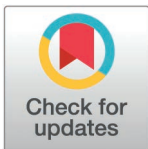

**OPEN ACCESS**

**Citation:** Golestani S, Talebian MT, Golestani A, Ahadi Z, Tabatabaei-Malazy O, Fard ZA, et al. (2026) A 30-year analysis of urolithiasis burden in the North Africa and Middle East region: Findings from the global burden of disease study 2021. *PLoS One* 21(5): e0343341. <https://doi.org/10.1371/journal.pone.0343341>

**Editor:** Gurinder Kumar, Metrohealth Medical Center, UNITED STATES OF AMERICA

**Received:** May 2, 2025

**Accepted:** February 4, 2026

**Published:** May 4, 2026

**Copyright:** © 2026 Golestani et al. This is an open access article distributed under the terms of the [Creative Commons Attribution License](https://creativecommons.org/licenses/by/4.0/), which permits unrestricted use, distribution, and reproduction in any medium, provided the original author and source are credited.

**Data availability statement:** Data used in this study are freely and publicly available from the Global Burden of Disease (GBD) 2021 database through the Global Health Data Exchange (GHDx) portal (<https://ghdx.healthdata.org/gbd-2021>) and the GBD Compare visualization

## Abstract

### Background

Urolithiasis, a prevalent urological disorder, is associated with significant morbidity and economic burden. Despite the Global Burden of Disease (GBD) data, regional specificity for urolithiasis burden in North Africa and Middle East (NAME) remains limited. This study aims to fill this gap by analyzing the burden of urolithiasis in the NAME region from 1990 to 2021.

### Methods

Data from the GBD 2021 study were used to evaluate key health measures, including incidence, prevalence, mortality, years lived with disability (YLDs), years of life lost (YLLs), and disability-adjusted life years (DALYs). Age-standardized rates (ASRs) and absolute numbers were assessed across 21 NAME countries, stratified by sex, age, and sociodemographic index (SDI). Results were presented with 95% uncertainty intervals.

### Results

In 2021, the overall incidence reached 5.3 million (95% uncertainty intervals: 4.2–6.8) cases, compared to 2.0 million (1.6–2.5) in 1990. Prevalence rose from about 76,000 (61,000–96,000) cases in 1990–201,000 (160,000–257,000) in 2021. The number of deaths increased considerably from 142.1 (79.8–194.5) to 394.2 (182.4–509.5), and the DALYs rose from 10,814.0 (7,970.0–13,932.3) to 25,213.3 (17,943.5–33,787.7) from 1990 to 2021. ASRs for all burden measures remained stable and females consistently exhibited lower rates compared to males. There was a positive correlation

tool (<https://vizhub.healthdata.org/gbd-compare/>). The data are aggregated at the national and regional levels and contain no personally identifiable information. The data are owned and maintained by the Institute for Health Metrics and Evaluation (IHME), University of Washington. For data access or other inquiries researchers may contact IHME via email ([data@healthdata.org](mailto:data@healthdata.org)).

**Funding:** The author(s) received no specific funding for this work.

**Competing interests:** The authors have declared that no competing interests exist.

between SDI and rates of incidence, prevalence, and YLDs; however, deaths, YLLs, and DALYs exhibited no significant correlation with SDI.

## Conclusion

Urolithiasis imposes a growing health and economic burden in the NAME region, particularly among middle-aged populations and high-SDI countries. Targeted interventions and region-specific policies are crucial to address the rising disease burden effectively.

## Introduction

Urolithiasis is a common urological disorder characterized by the formation of stones or calculi in the kidneys, bladder, or urethra. These stones can vary in composition, with calcium oxalate being the most prevalent type, accounting for a significant proportion of cases [1]. Clinically, urolithiasis is associated with a range of medical complications, including renal colic and hydronephrosis. Bilateral lithiasis, which more likely affects males and causes hyperuricemia, presents greater clinical challenges than unilateral stones. Additionally, the disorder has a high recurrence rate, which imposes substantial social and economic burdens on individuals and healthcare systems [2,3]. The etiology of urolithiasis is multifactorial, involving a complex interplay of genetic, environmental, and lifestyle factors. Several risk factors contribute to its development, such as dietary patterns, insufficient water intake, alcohol consumption, high body mass index (BMI), sedentary lifestyles, and excessive consumption of red meat [4–6]. Despite its health impact, urolithiasis awareness remains low in North Africa and Middle East (NAME) countries like Saudi Arabia [7]. This underscores the importance of raising awareness and understanding this condition to mitigate its impact.

Globally, urolithiasis exhibits a prevalence rate ranging from 1% to 20% across different regions [8]. It is more commonly diagnosed in males than females, reflecting a sex disparity in its occurrence [9]. While the absolute numbers of cases, as well as disability-adjusted life years (DALYs) attributable to urolithiasis, have been increasing, age-standardized rates (ASRs) of its global burden have shown a decline. Interestingly, mortality rates associated with urolithiasis have remained stable over the years, though significant regional variability exists [10]. Regional studies present contrasting patterns, with the NAME region experiencing an 83.2% increase in urolithiasis cases between 2000–2021 [10], while Afghanistan in the Middle East demonstrated one of the world's most substantial declines in incidence rates [11]. Cross-national comparisons reveal interesting variations, such as Iran's higher urolithiasis prevalence compared to Jordan in the Middle East, potentially associated with differences in antibiotic prescribing practices [12]. The NAME region exhibits unique risk factors: elevated ambient temperatures [13,14] and excessive sodium consumption (among the highest globally), which promote hypercalciuria and lithogenesis [15,16]. The economic toll of this condition is considerable; in 2007, the total cost of managing urolithiasis was estimated at \$3.79 billion in the United States, and

this figure is projected to rise by an additional \$780 million by 2030 [17]. Importantly, these costs may be mitigated through preventive measures, with increased water intake demonstrating particular efficacy as a cost-effective intervention [18]. These statistics highlight the pressing need for a deeper understanding of the disease burden in NAME region to develop cost-effective interventions and policies.

Given its high prevalence and significant economic impact, urolithiasis demands greater attention from policymakers and healthcare providers. A nuanced understanding of its burden, particularly its variability across different regions, is essential for effective resource allocation. Although global burden of disease (GBD) studies provide comprehensive estimates of disease burden, including urolithiasis, they often focus on global or national levels, with limited regional specificity [8–10,9–24]. To date, no study has specifically examined the burden of urolithiasis in the NAME region, despite the unique sociodemographic and environmental characteristics of this area. Our study addresses this gap through NAME-specific analyses, extending beyond GBD parameters to investigate Socio-Demographic Index (SDI)-stratified trends not available in standard GBD reports. Furthermore, we extend beyond GBD parameters by investigating the underlying drivers of urolithiasis burden trends in the region.

This study seeks to address this gap by utilizing GBD data to estimate key health measures associated with the burden of urolithiasis in the NAME region from 1990 to 2021. These measures include prevalence, incidence, mortality, years lived with disability (YLDs), years of life lost (YLLs), and DALYs, both as all age numbers and ASRs. The study further stratifies findings by age, sex, and SDI, providing a comprehensive view of the disease burden and its relationship with various health indicators in this region.

## Materials and methods

### Data source

The GBD 2021 study provides comprehensive annual estimates from 1990 to 2021, encompassing 371 diseases and injuries across 204 countries and territories. Additionally, it includes subnational data from hospitals and claims for more than 20 countries, offering a detailed and extensive framework for assessing global health trends [25]. Key health measures, including incidence, prevalence, deaths, YLDs, YLLs, and DALYs related to urolithiasis, were extracted for the 21 NAME countries over the period from 1990 to 2021. Data retrieval was facilitated using publicly available resources, such as the GBD Result tool (available via: <https://vizhub.healthdata.org/gbd-results/>) and the Global Health Data Exchange (GHDx) results tool (available via: <http://ghdx.healthdata.org/gbd-results-tool>). All analytical steps in the GBD study adhered to the Guidelines for Accurate and Transparent Health Estimates Reporting (GATHER) [26]. This study focuses on the NAME region, which is one of seven super-regions defined by GBD 2021. The NAME region comprises 21 countries: Afghanistan, Algeria, Bahrain, Egypt, Iran, Iraq, Jordan, Kuwait, Lebanon, Libya, Morocco, Oman, Palestine, Qatar, Saudi Arabia, Sudan, Syria, Tunisia, Turkey, the United Arab Emirates, and Yemen. Notably, this differs from the World Bank's Middle East and North Africa (MENA) grouping, which excludes Sudan and Turkey but includes Israel. We maintained the GBD's NAME classification to ensure methodological consistency with our primary data source, thereby facilitating valid comparisons with other GBD research while still encompassing the principal nations of epidemiological relevance in this geographical area. Urolithiasis was defined as abnormal formation of crystalline masses along the urinary tract using the International Classification of Diseases with corresponding codes from the 10th Revision (ICD-10: N20–N23) [27]. This study includes data for both sexes and analyzes health measures at all ages, as well as using ASRs to allow for better comparability across populations. The age stratification followed a detailed structure, beginning with 2–4 years, and continuing in 5-year intervals from the age of 5 onward.

### YLDs, YLLs, DALYs, and SDI estimates

Our burden estimation employed standardized GBD metrics to quantify both fatal and non-fatal health impacts of urolithiasis. For Years Lived with Disability (YLDs), we applied disability severity weights to various clinical manifestations of urolithiasis, representing their relative health impact. These weights were multiplied by condition-specific prevalence rates

across severity categories, yielding an aggregate measure of non-fatal burden. Years of Life Lost (YLLs) were derived by multiplying age-specific mortality counts by the corresponding remaining life expectancy based on global reference standards, thus quantifying premature mortality [25].

The composite Disability-Adjusted Life Year (DALY) metric was calculated by summing YLDs and YLLs, providing a comprehensive measure of total disease burden. To enable cross-population comparisons, we age-standardized all estimates using the GBD reference population [25].

The SDI is a composite indicator designed to reflect a country's developmental status. It consists of the geometric mean of lag-distributed income per capita, mean years of education among adults, and the total fertility rate for females under 25 years of age [25]. The index ranges from 0 to 1, where a value of 1 represents the highest level of sociodemographic development.

## Data analysis

The analysis employed two primary modeling tools: spatiotemporal Gaussian process regression (ST-GPR) and Disease Modelling-Meta regression (DisMod-MR) [25]. The relationship between SDI and burden measures was assessed using locally weighted regression and scatterplot smoothing (LOESS) regression. Uncertainty intervals (UIs) at the 95% confidence level were generated for each measure based on 500 draws from the posterior distribution, derived from the 2.5th and 97.5th percentiles. Statistical significance was determined by the absence of overlap in the 95% UIs [25]. To adjust for differences in population sizes, the data were presented as rates per 100,000 individuals. Furthermore, the age distribution was standardized using the GBD global standard population structure to account for variations in population age demographics [27]. Data visualizations were created using Python programming language (version 3.12.4).

## Ethics approval and consent to participate

This research was conducted in accordance with the principles of the Declaration of Helsinki. The findings are derived from aggregated estimates provided by the Global Burden of Disease (GBD) 2021 study, which comply with all applicable guidelines and regulations. As the study used publicly available, de-identified, aggregated data and did not involve direct interaction with human participants, no informed consent was required. This study was approved by the Ethics Review Board of Sina Hospital, Tehran University of Medical Sciences (IR.TUMS.SINAHOSPITAL.REC.1403.080).

## Results

### Trends in all-age measures

From 1990 to 2021, there was a marked increase in the burden of urolithiasis across multiple burden measures. This upward trend was observed for both males and females, although the numbers for females were consistently lower across all measures. Incidence rose significantly from 2.0 million (95% UI: 1.6–2.5) in 1990 to 5.3 million (4.2–6.8) in 2021, by 163.4% (147.3–175.8). Similarly, the prevalence grew from 75,961.0 (60,829.6–95,790.6) to 200,852.9 (159,841.8–256,394.9) over the same period by 164.4% (148.6–176.7). The number of deaths attributed to urolithiasis also increased considerably, from 142.1 (79.8–194.5) in 1990 to 394.2 (182.4–509.5) in 2021. The DALYs associated with urolithiasis rose from 10,814.0 (7,970.0–13,932.3) in 1990 to 25,213.3 (17,943.5–33,787.7) in 2021, by 133.2% (93.0–175.4). While YLLs and YLDs number were approximately similar in 1990, YLD number was about 1.5 times of YLLs in 2021 (Fig 1 and Table 1).

### Trends in age-standardized rates

The ASRs of burden measures for urolithiasis showed no statistically significant change from 1990 to 2021. Across all measures, females consistently exhibited the lower rates compared to males. Except for the incidence ASR, which showed a slight increase of 7.6% (95% UI: 6.2–9.4) from 791.1 (637.4–997.9) per 100,000 population in 1990 to 851.4 (686.6–1,075.2) in 2021, other measures remained unchanged compared to 1990. In 2021, the prevalence ASR was 32.3

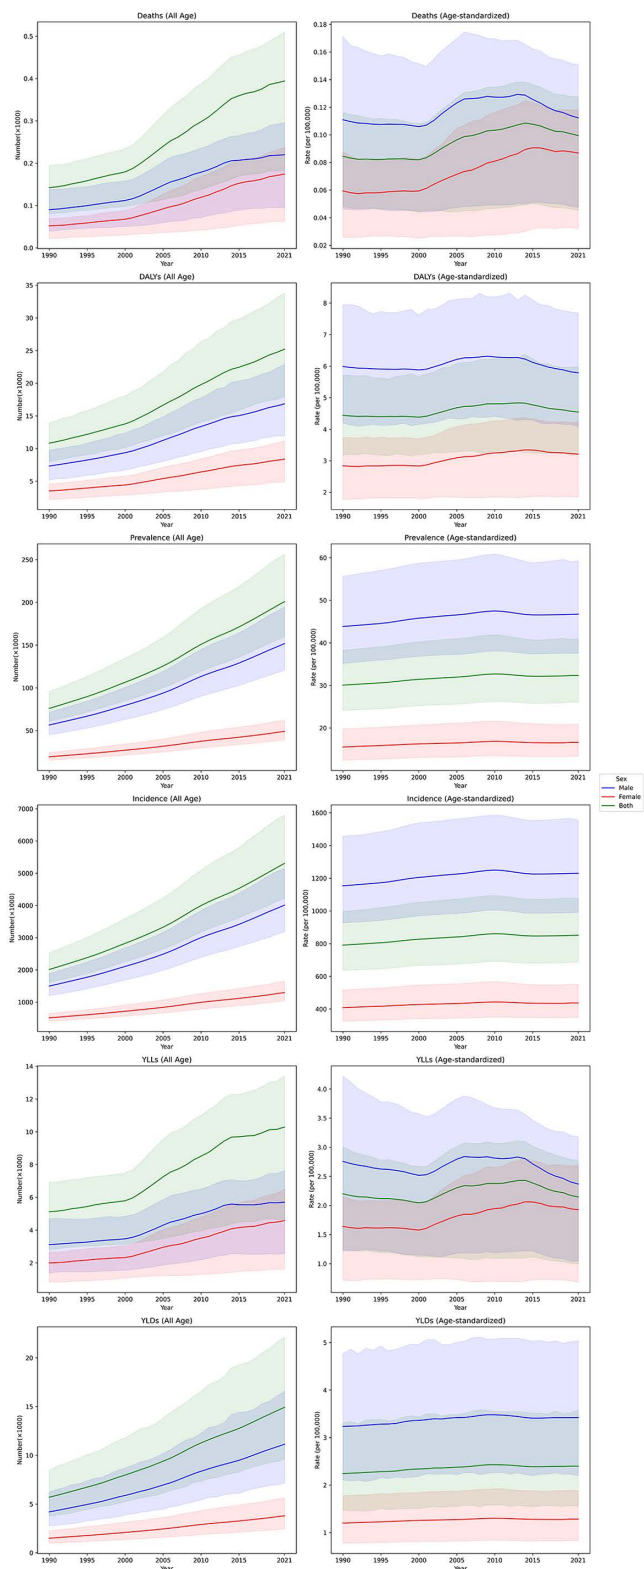

**Fig 1. Trends in incidence, prevalence, deaths, YLDs, YLLs, and DALYs of urolithiasis from 1990 to 2021 across males, females, and both sexes.** YLD = years lived with disability, YLL = years of life lost, DALY = disability-adjusted life years.

<https://doi.org/10.1371/journal.pone.0343341.g001>

**Table 1. Comparison of urolithiasis incidence, prevalence, deaths, YLDs, YLLs, and DALYs in North Africa and Middle East region between 1990 and 2021.**

| Mea-<br>sure    | Metric             | Year                                     |                                       |                                          |                                          |                                          |                                          | Percent change (1990–2021)<br>(95% UI) |                              |                              |
|-----------------|--------------------|------------------------------------------|---------------------------------------|------------------------------------------|------------------------------------------|------------------------------------------|------------------------------------------|----------------------------------------|------------------------------|------------------------------|
|                 |                    | 1990 (95% UI)                            |                                       |                                          | 2021 (95% UI)                            |                                          |                                          | both                                   | female                       | male                         |
|                 |                    | both                                     | female                                | Male                                     | both                                     | female                                   | male                                     |                                        |                              |                              |
| Deaths          | All ages<br>Number | 142.1 (79.8 to<br>194.5)                 | 52.0 (22.7 to<br>69.8)                | 90.1 (39.5 to<br>138.1)                  | 394.2 (182.4<br>to 509.5)                | 174.3 (62.5 to<br>238.0)                 | 219.9 (94.8 to<br>295.6)                 | 177.4<br>(63.0 to<br>289.1)            | 235.2<br>(88.9 to<br>412.8)  | 144.0<br>(36.5 to<br>283.3)  |
| Deaths          | ASR                | 0.1 (0.0 to 0.1)                         | 0.1 (0.0 to<br>0.1)                   | 0.1 (0.0 to 0.2)                         | 0.1 (0.0 to 0.1)                         | 0.1 (0.0 to 0.1)                         | 0.1 (0.0 to 0.2)                         | 17.7<br>(–32.9 to<br>63.6)             | 46.2<br>(–11.6 to<br>112.1)  | 1.2<br>(–45.7 to<br>57.9)    |
| DALYs           | All ages<br>Number | 10814.0<br>(7970.0 to<br>13932.3)        | 3497.1<br>(2231.5 to<br>4590.8)       | 7316.9<br>(5145.0 to<br>9753.6)          | 25213.3<br>(17943.5 to<br>33787.7)       | 8373.8<br>(4924.0 to<br>11174.9)         | 16839.5<br>(11909.5 to<br>22902.0)       | 133.2<br>(93.0 to<br>175.4)            | 139.4<br>(79.6 to<br>202.8)  | 130.1<br>(86.3 to<br>188.1)  |
| DALYs           | ASR                | 4.4 (3.2 to 5.7)                         | 2.8 (1.8 to<br>3.7)                   | 6.0 (4.2 to 7.9)                         | 4.5 (3.2 to 6.0)                         | 3.2 (1.8 to 4.2)                         | 5.8 (4.1 to 7.7)                         | 2.3<br>(–18.5 to<br>20.5)              | 13.1<br>(–19.0 to<br>39.2)   | –3.3<br>(–23.5 to<br>18.8)   |
| YLDs            | All ages<br>Number | 5698.8<br>(3795.2 to<br>8459.9)          | 1497.2<br>(988.0 to<br>2258.4)        | 4201.5<br>(2782.4 to<br>6225.4)          | 14924.7<br>(9610.2 to<br>22123.7)        | 3791.5<br>(2451.0 to<br>5629.4)          | 11133.2<br>(7156.6 to<br>16581.4)        | 161.9<br>(142.5 to<br>184.6)           | 153.2<br>(136.9 to<br>166.9) | 165.0<br>(140.2 to<br>193.8) |
| YLDs            | ASR                | 2.2 (1.5 to 3.3)                         | 1.2 (0.8 to<br>1.8)                   | 3.2 (2.1 to 4.8)                         | 2.4 (1.6 to 3.6)                         | 1.3 (0.8 to 1.9)                         | 3.4 (2.2 to 5.0)                         | 7.0 (0.3<br>to 14.9)                   | 6.9 (4.2<br>to 9.6)          | 5.8 (–2.9<br>to 16.4)        |
| YLLs            | All ages<br>Number | 5115.2 (2804.1<br>to 6931.6)             | 1999.9<br>(829.0 to<br>2660.8)        | 3115.3 (1377.9<br>to 4685.8)             | 10288.6<br>(4668.9 to<br>13397.8)        | 4582.3<br>(1601.2 to<br>6516.8)          | 5706.3<br>(2563.7 to<br>7633.8)          | 101.1<br>(17.6 to<br>188.7)            | 129.1<br>(26.3 to<br>282.1)  | 83.2 (8.0<br>to 214.6)       |
| YLLs            | ASR                | 2.2 (1.2 to 3.0)                         | 1.6 (0.7 to<br>2.2)                   | 2.8 (1.2 to 4.2)                         | 2.1 (1.0 to 2.8)                         | 1.9 (0.7 to 2.7)                         | 2.4 (1.0 to 3.2)                         | –2.4<br>(–43.2 to<br>36.7)             | 17.6<br>(–36.0 to<br>75.8)   | –14.1<br>(–51.8 to<br>35.6)  |
| Preva-<br>lence | All ages<br>Number | 75961.0<br>(60829.6 to<br>95790.6)       | 19355.4<br>(15341.3 to<br>24386.2)    | 56605.6<br>(45153.0 to<br>71521.7)       | 200852.9<br>(159841.8 to<br>256394.9)    | 49077.9<br>(39124.9 to<br>62304.6)       | 151775.0<br>(120902.4 to<br>194794.8)    | 164.4<br>(148.6 to<br>176.7)           | 153.6<br>(137.3 to<br>167.3) | 168.1<br>(152.2 to<br>180.4) |
| Preva-<br>lence | ASR                | 30.1 (24.1 to<br>38.2)                   | 15.5 (12.4 to<br>19.8)                | 43.9 (35.1 to<br>55.6)                   | 32.3 (26.0 to<br>40.9)                   | 16.6 (13.4 to<br>20.9)                   | 46.7 (37.5 to<br>59.3)                   | 7.5 (6.0<br>to 9.3)                    | 7.0 (4.7<br>to 9.3)          | 6.6 (4.6<br>to 8.8)          |
| Inci-<br>dence  | All ages<br>Number | 2013198.6<br>(1612875.7 to<br>2532059.3) | 512789.0<br>(407871.1 to<br>645938.6) | 1500409.6<br>(1202259.7 to<br>1891919.6) | 5303600.3<br>(4215645.1 to<br>6801403.6) | 1295209.2<br>(1037493.5 to<br>1648394.8) | 4008391.1<br>(3181258.7 to<br>5141710.1) | 163.4<br>(147.3 to<br>175.8)           | 152.6<br>(135.9 to<br>166.3) | 167.2<br>(150.3 to<br>180.1) |
| Inci-<br>dence  | ASR                | 791.1 (637.4<br>to 997.9)                | 408.6 (325.9<br>to 517.1)             | 1153.8 (926.7<br>to 1457.9)              | 851.4 (686.6<br>to 1075.2)               | 437.4 (348.9<br>to 552.8)                | 1230.4 (991.0<br>to 1555.4)              | 7.6 (6.2<br>to 9.4)                    | 7.0 (4.8<br>to 9.3)          | 6.6 (4.8<br>to 8.8)          |

• **YLDs:** Years lived with disability; **YLLs:** Years of life lost; **DALYs:** Disability-adjusted life years; ASR=Age-standardized Rate.

<https://doi.org/10.1371/journal.pone.0343341.t001>

(26.0–40.9) per 100,000, the death ASR was 0.1 (0.0–0.1), and the DALYs ASR was 4.5 (3.2–6.0). The YLDs and YLLs ASRs were also similar, remaining approximately 2 per 100,000 population from 1990 to 2021 ([Fig 1](#) and [Table 1](#)).

### Age-standardized rates in different countries

In 1990, Qatar had the highest ASR of incidence at 941.8 (95% UI: 743.0–1206.0) per 100,000 population, whereas Afghanistan had the lowest rate, at 721.9 (578.4–927.4). Interestingly, when disaggregated by sex, Iran recorded the highest incidence rates for both males at 1223.0 (985.1–1555.7) and females at 438.7 (350.5–553.8) per 100,000 population. By 2021, the incidence rates increased in most countries, with Jordan emerging as the country with the highest rates at 1056.4 (854.0–1338.9) per 100,000, while Afghanistan continued to have the lowest rates, at 763.3 (607.8–958.7). A similar trend was observed in the ASR of prevalence. In 1990, Qatar led the region with the highest prevalence rate at

35.8 (95% UI: 28.3–45.9) per 100,000 population, while Afghanistan had the lowest prevalence at 27.5 (21.9–35.0). By 2021, prevalence rates increased across most countries in the region. Jordan recorded the highest prevalence at 40.1 (32.3–50.9) per 100,000, while Afghanistan remained at the lower end, with a rate of 29.0 (22.9–36.0) (Figs 2 and 3).

The ASRs of deaths and YLDs attributable to urolithiasis remained relatively low and stable across the NAME region in both 1990 and 2021, with death rates below 0.4 and YLDs ranging between 2 and 3 per 100,000 population. Regarding

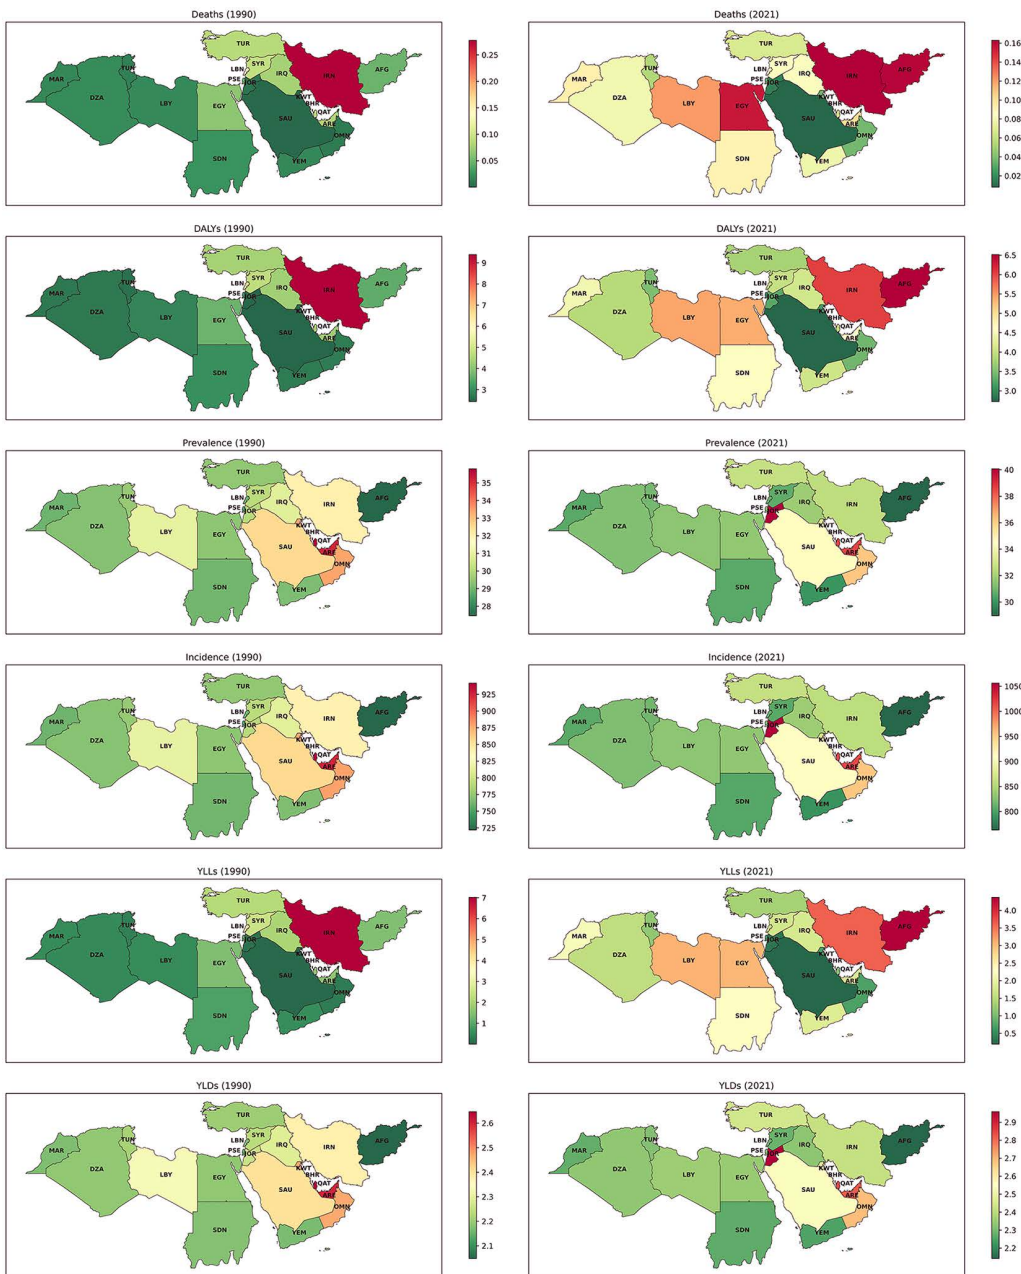

**Fig 2. ASRs of incidence, prevalence, deaths, YLDs, YLLs, and DALYs for urolithiasis across NAME countries in 1990 and 2021.** YLD = years lived with disability, YLL = years of life lost, DALY = disability-adjusted life years, ASR = Age-Standardized Rate.

<https://doi.org/10.1371/journal.pone.0343341.g002>

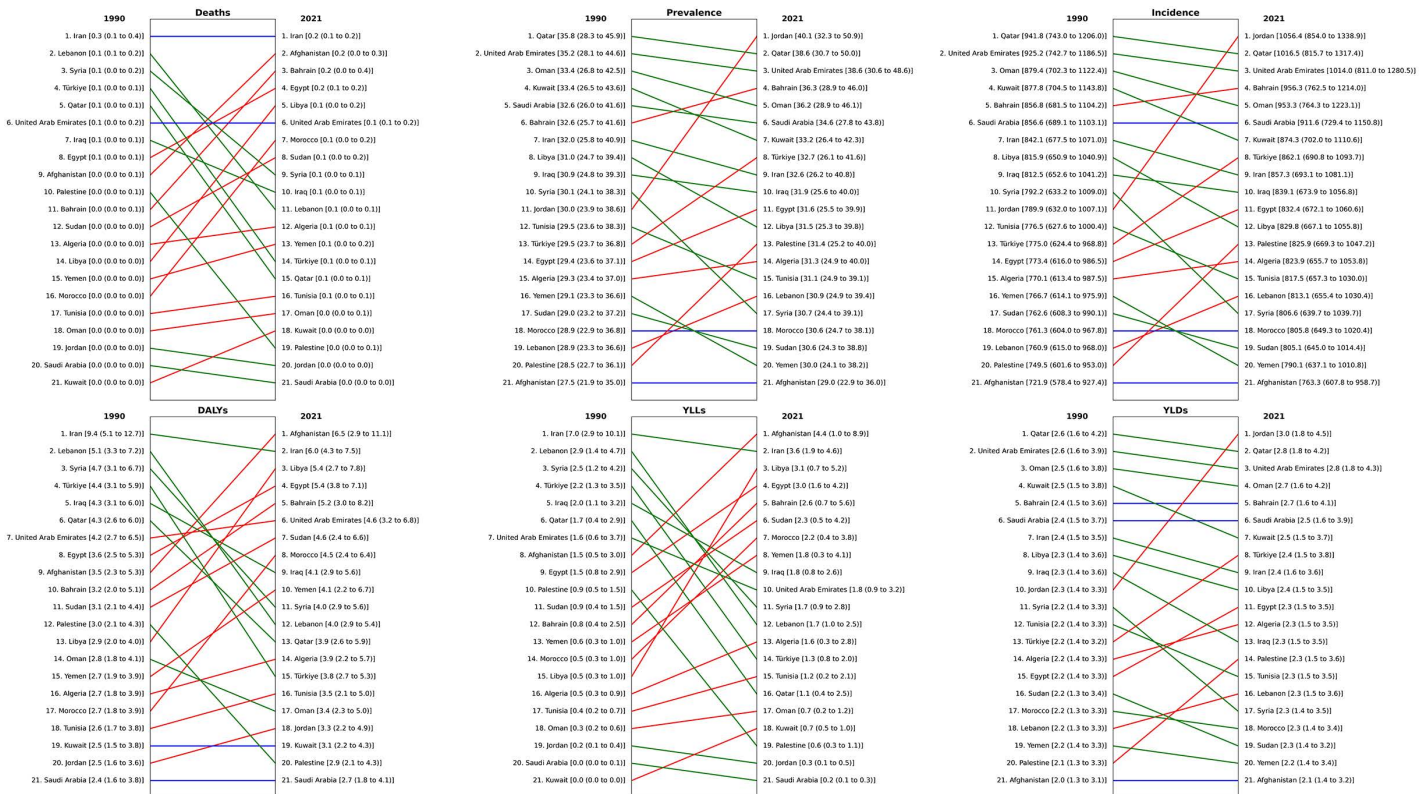

**Fig 3. Rankings of ASRs for incidence, prevalence, deaths, YLDs, YLLs, and DALYs of urolithiasis in different NAME countries from 1990 to 2021.** YLD = years lived with disability, YLL = years of life lost, DALY = disability-adjusted life years, ASR = Age-Standardized Rate.

<https://doi.org/10.1371/journal.pone.0343341.g003>

YLLs, Iran had the highest burden in 1990, at 7.0 (95% UI: 2.9–10.1) per 100,000. By 2021, Afghanistan recorded the highest YLLs, at 4.4 (1.0–8.9) per 100,000. The DALYs rates also highlighted disparities across countries. In 1990, Iran had the highest DALYs, at 9.4 (95% UI: 5.1–12.7) per 100,000, while Saudi Arabia reported the lowest at 2.4 (1.6–3.8). By 2021, Afghanistan had the highest DALYs, at 6.5 (2.9–11.1) per 100,000, whereas Saudi Arabia remained at the lower end with a rate of 2.7 (1.8–4.1) (Figs 2 and 3).

### Rates in different age groups

Fig 4 represents the comparison of age-specific rates per 100,000 population of burden measures related to urolithiasis across the NAME region in 1990 and 2021. The incidence, prevalence, and YLD rates exhibited a bell curve-like distribution across age groups, peaking at the 50–54-year age group for both males and females and showing consistent patterns over the years. Specifically, the incidence rate for the 50–54-year group increased from 1,854.0 (95% UI: 1,058.8–2,928.2) per 100,000 in 1990–2,031.7 (1,164.2–3,199.0) in 2021. Similarly, prevalence in the same age group rose from 71.0 (39.2–111.2) per 100,000 in 1990 to 77.6 (43.5–120.8) in 2021. For YLDs, the rate increased slightly, reaching 5.7 (2.7–10.1) per 100,000 in 2021 compared to 5.2 (2.5–8.9) in 1990 (Fig 4).

In contrast, deaths, YLLs, and DALYs were more pronounced in older age groups. The highest rates were observed in individuals aged 90–94 years for both sexes combined, while males and females individually peaked in the 90–94 and 85–89 age groups, respectively. In 1990, the death rate for the 90–94 age group across both sexes was 2.2 (95% UI: 0.9–3.9) per 100,000, which increased to 3.1 (1.4–4.4) in 2021. The YLL rate for this age group similarly rose, from 19.1

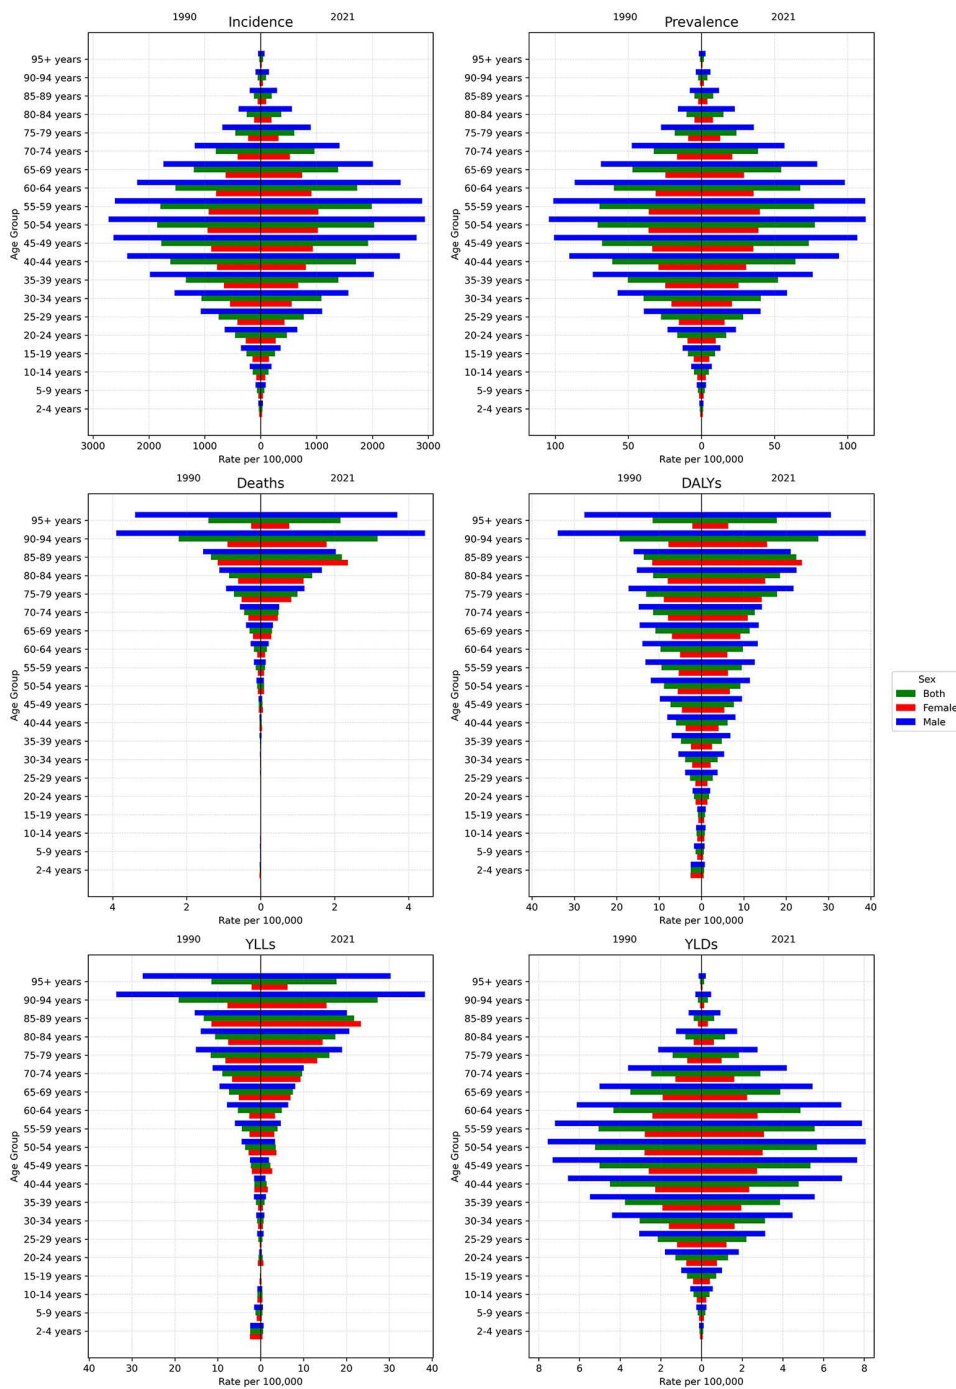

**Fig 4. Rates of incidence, prevalence, deaths, YLDs, YLLs, and DALYs of urolithiasis across different age groups in 1990 and 2021.** YLD=years lived with disability, YLL=years of life lost, DALY=disability-adjusted life years.

<https://doi.org/10.1371/journal.pone.0343341.g004>

(7.7–33.7) per 100,000 in 1990 to 27.2 (11.9–37.7) in 2021. Finally, the DALY rate for individuals aged 90–94 years grew from 19.2 (7.8–33.8) per 100,000 in 1990 to 27.6 (12.3–38.0) in 2021. It is also noteworthy that while in 1990, the levels of DALYs and YLLs for age groups under 20 years old were minimal, they significantly decreased by 2021.

## Burden vs SDI

Overall, the ASRs for incidence, prevalence, and YLDs exhibited a positive association with SDI. In contrast, deaths, YLLs, and DALYs demonstrated no significant correlation with SDI across the NAME region. Interestingly, some countries deviated from these overall trends and displayed unique patterns. For example, in Iran, a negative correlation was observed between SDI and deaths, YLLs, and DALYs (Fig 5).

## Discussion

This study provides a detailed evaluation of the burden of urolithiasis in the NAME region from 1990 to 2021, shedding light on key trends, disparities, and determinants. The findings revealed substantial increases in absolute numbers of incidence, prevalence, YLDs, and DALYs, underscoring the rising public health impact of urolithiasis, particularly among middle-aged populations. Interestingly, the ASRs for deaths and YLLs remained stable or declined slightly over time,

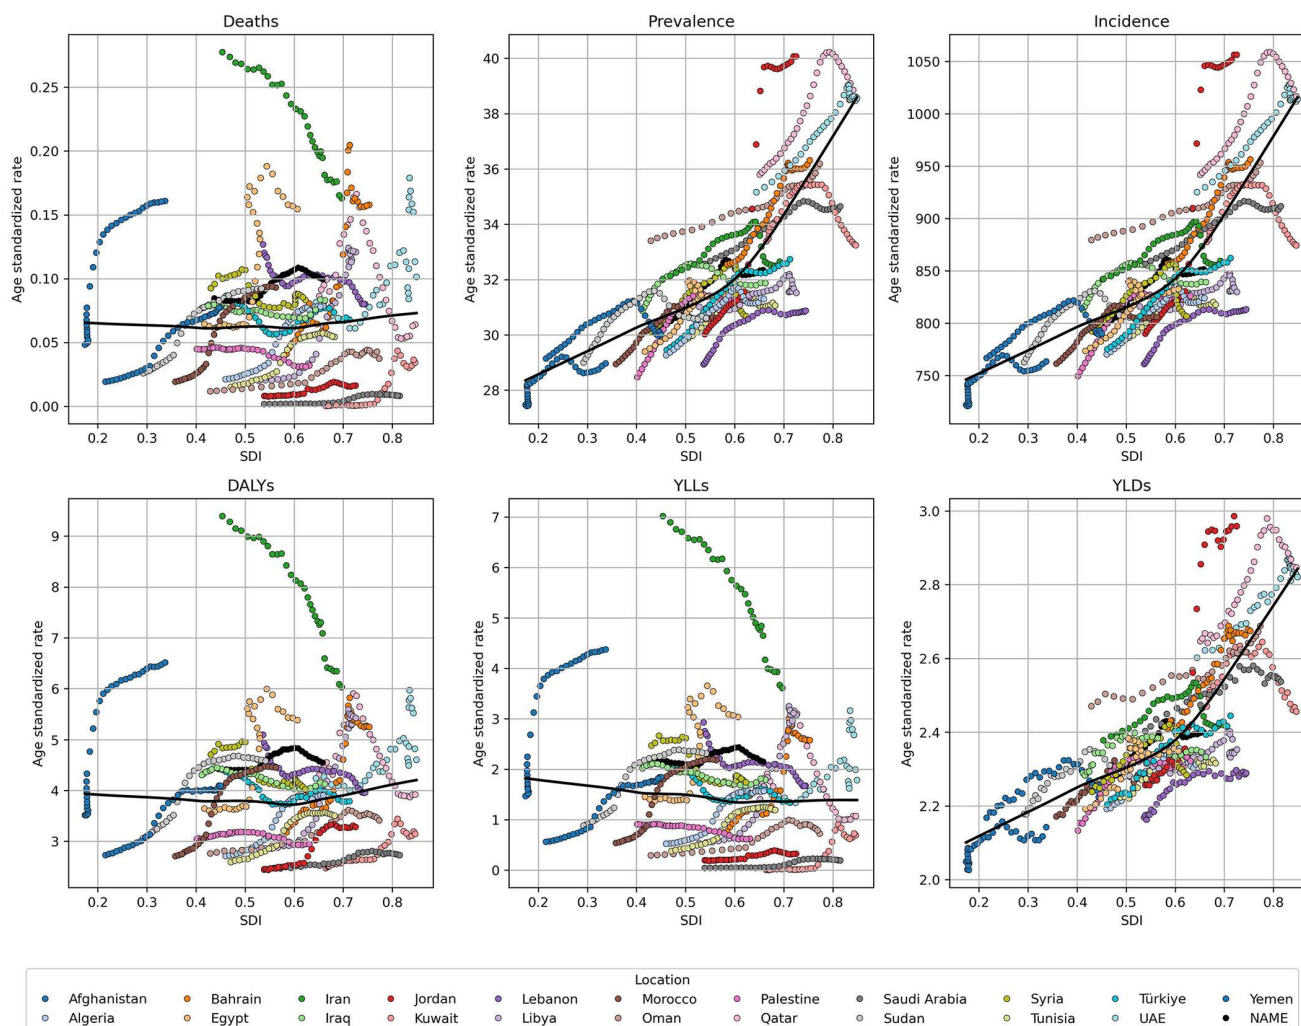

**Fig 5. Relationship between SDI and ASRs of incidence, prevalence, deaths, YLDs, YLLs, and DALYs of urolithiasis in NAME countries (1990–2021).** SDI = socio-demographic index, YLD = years lived with disability, YLL = years of life lost, DALY = disability-adjusted life years, ASR = Age-Standardized Rate.

<https://doi.org/10.1371/journal.pone.0343341.g005>

suggesting improvements in healthcare access and disease management. Similar upward trends in the burden of urolithiasis have been observed in other global studies [28]. However, most studies indicate a decline in the burden from 1990 to 2019 in specific regions [9,21,22,29,30]. Additionally, evidence highlights that while some regions have experienced an increased burden from 2000 to 2021, others have shown a decline [10] emphasizing the need for region-specific analyses. The observed increase in urolithiasis burden within the NAME region likely results from multiple interacting factors, consistent with the disease's multifactorial etiology. Existing literature implicates population aging, dietary pattern changes, and climate change impacts as potential contributors [31–35]. Additional environmental and metabolic determinants, which will be explored in subsequent sections, may further explain these epidemiological patterns. One of the most striking findings of this study is the heterogeneity in urolithiasis burden across the NAME region. High-SDI countries, such as Qatar, Iran, and Jordan, exhibited the highest rates of incidence and prevalence, while low-SDI countries, including Afghanistan and Sudan, consistently reported lower rates. This pattern aligns with other studies demonstrating a positive correlation between SDI and the burden of urolithiasis [22]. However, some studies have reported only a weakly positive correlation, indicating potential variability based on regional factors [9]. The observed disparities are likely influenced by differences in diagnostic capacity, healthcare access, and public awareness rather than true variations in prevalence. In high-SDI countries, the widespread availability of advanced imaging technologies, such as Computed Tomography (CT) scans, facilitates higher detection rates. Conversely, limited diagnostic resources in low-SDI settings may result in significant underreporting. Emerging technologies like augmented reality (AR) have shown promise in reducing the burden of urolithiasis in low- and middle-income countries, offering innovative pathways for improved diagnosis and management [36].

The positive association between SDI and non-fatal measures, such as incidence, prevalence, and YLDs, underscores the influence of socioeconomic development on the epidemiology of urolithiasis. While improved healthcare infrastructure and diagnostic capabilities in high-SDI countries contribute to higher detection rates, these regions also face lifestyle-related risk factors associated with development. Sedentary behavior, high BMI, and dietary patterns characterized by excessive intake of salt, sugar, and animal protein are prominent in high-SDI countries [37–39]. Such factors not only elevate the risk of urolithiasis but also exacerbate related conditions like hypertension, further increasing the disease burden [40]. Encouraging healthy dietary habits can mitigate these risks and reduce the prevalence of urolithiasis.

Age-specific analyses revealed distinct patterns, with the highest incidence, prevalence, and YLD rates occurring in the 50–54-year age group, consistent with the natural history of urolithiasis. This age group represents a peak period for stone formation due to metabolic and dietary factors. Similar trends have been reported in other studies, with peak rates observed in the 55–59 [22], 50–59 [41], and 30–49 age groups [42]. Conversely, deaths, YLLs, and DALYs were predominantly concentrated in older age groups, particularly those aged 85–94 years. This highlights the amplified impact of urolithiasis in the elderly, where comorbidities and decreased physiological resilience exacerbate disease outcomes.

Sex disparities were evident, with males consistently exhibiting higher rates of incidence, prevalence, and YLLs than females. These findings align with existing literature [43,44], and may be attributed to sex-specific risk factors such as hormonal differences, occupational exposures, and behavioral patterns. Testosterone, for instance, has been shown to inhibit osteopontin expression, a protective factor against urolithiasis, potentially explaining higher male susceptibility [45]. However, the faster rate of increase in urolithiasis burden among females observed in this study suggests that shifting lifestyle patterns, including dietary changes and reduced physical activity, may be narrowing the historical gender gap.

Environmental conditions in the NAME region significantly contribute to the high prevalence of urolithiasis. The arid climate and high temperatures characteristic of many countries in the region increase the risk of dehydration, a well-known contributor to urolithiasis [44,46,47]. Furthermore, the quality of drinking water in many parts of the NAME region may exacerbate this risk due to elevated concentrations of minerals which have been linked to an increased propensity for urinary crystallization [48,49]. Another emerging environmental concern is the rising level of air pollution, particularly fine

particulate matter (PM<sub>2.5</sub>). Recent studies indicate that prolonged exposure to PM<sub>2.5</sub>, which is increasingly prevalent in urban areas of the NAME region [50], may elevate the risk of nephrolithiasis [51]. Additionally, food safety concerns related to heavy metal contamination—such as cadmium—have been identified in livestock and agricultural products across the Middle East [52]. Chronic ingestion of these toxic elements has been linked to stone formation [53,54]. Addressing these environmental determinants through public health initiatives, such as implementing water purification systems to reduce mineral and heavy metal content, alongside stricter regulations on industrial emissions and agricultural contaminants, could significantly reduce the disease burden.

Metabolic abnormalities play a pivotal role in the pathogenesis of urolithiasis, with distinct patterns observed in the NAME region. Hypercalciuria, driven by excessive dietary sodium, animal protein, and genetic predispositions, remains the most common lithogenic risk factor [55–58], particularly in NAME countries where processed food consumption is becoming more prevalent [59]. Similarly, hyperoxaluria due to high oxalate diets in the United Arab Emirates, Kuwait and Saudi Arabia—contributes to calcium oxalate stone formation [32,60], while hypocitraturia, exacerbated by low fruit/vegetable intake in Arab countries, further elevates risk [61,62]. The NAME region's rising rates of obesity and type 2 diabetes introduce additional metabolic complexities; insulin resistance promotes urinary ammonium retention, creating a favorable environment for stone formation [63–66]. Collectively, these metabolic disturbances underscore the need for dietary counseling and biochemical screening in high-risk populations, especially where lifestyle transitions outpace public health interventions.

The infectious complications of urolithiasis represent a critical clinical concern in the NAME region, where specific epidemiological and healthcare factors amplify these risks. Obstructive stones, especially those causing ureteral blockage, lead to urinary stasis, fostering bacterial growth—particularly urease-producing gram-negative bacteria, as highlighted in regional research [67–69]. Environmental factors in NAME, such as high temperatures and dehydration, contribute to concentrated urine, while water scarcity in certain areas may further increase stone formation [48,70–73]. Additionally, the region's rising diabetes epidemic (with a prevalence of 12.2%) heightens infection susceptibility due to insulin resistance [64,73–76]. There is also an observed upward trend in urinary tract infections, which may be partly associated with urolithiasis [77]. Compounding the issue, NAME faces high antimicrobial resistance rates, including methicillin-resistant *Staphylococcus aureus* (MRSA), complicating treatment [78,79]. These findings emphasize the necessity for enhanced clinical strategies, such as region-specific antibiotic prophylaxis and public health initiatives promoting early symptom detection. Addressing these infectious risks represents a pressing public health priority for NAME healthcare systems.

A critical methodological consideration emerges from the distinction between the NAME (GBD classification) and MENA (World Bank classification) regional definitions. As noted in our methods, the exclusion of Afghanistan – which demonstrated among the lowest burden rates in our study – from the MENA grouping could potentially lead to overestimation of urolithiasis burden when comparing NAME region data with MENA-based analyses.

The findings of this study have significant implications for public health and policy. First, the rising burden of urolithiasis calls for enhanced prevention efforts, including educational campaigns to raise awareness about risk factors such as dietary habits, fluid intake, and physical inactivity. Second, targeted interventions are needed to address the disparities in disease burden, particularly in low-SDI countries where underreporting and limited access to healthcare may mask the true extent of the problem. Investing in diagnostic infrastructure and training healthcare professionals in these settings could improve detection and management rates. Third, regional collaboration among NAME countries could facilitate the sharing of best practices and resources, such as adopting standardized protocols for urolithiasis management. Efforts to incorporate urolithiasis into broader non-communicable disease strategies, given its shared risk factors with conditions like obesity and diabetes, could also yield synergistic benefits.

Future research should focus on understanding the role of genetic predisposition and dietary patterns unique to the NAME region, which may influence urolithiasis risk. Additionally, exploring the cost-effectiveness of preventive measures,

such as hydration campaigns and dietary counseling, could guide resource allocation. Longitudinal studies examining the impact of climate change on urolithiasis trends would also be valuable, given the region's vulnerability to rising temperatures and water scarcity. Future iterations of GBD studies would benefit from subcategorizing kidney disease etiologies to better quantify stone-related morbidity burdens. Prospective regional studies tracking stone to end-stage renal disease progression could further clarify this relationship.

This study has several strengths that contribute to its significance and reliability. First, it utilizes data from the GBD 2021 study, one of the most comprehensive and up-to-date datasets available, ensuring robust and standardized estimates of health measures across 21 countries in the NAME region. Second, the study employs ASRs, allowing for accurate comparisons across populations with different demographic structures. Third, the analysis provides a nuanced understanding of the burden of urolithiasis by stratifying results by age, sex, and SDI, which highlights key variations and patterns across the region. However, this study has several limitations. The reliance on model-based estimates means that the results are subject to potential inaccuracies stemming from data gaps or biases in input data sources. For example, local variations in healthcare access, diagnostic practices, and reporting standards may not be fully captured. Also, while this study focuses on the NAME region, its findings may not be generalizable to other regions with different environmental and demographic profiles. Furthermore, this study did not explore the effects of potential risk factors that contribute to the urolithiasis burden, which needs further investigation. Finally, Our mortality estimates aggregate all urolithiasis-associated deaths without stratifying by specific causes. Future studies with cause-specific mortality data could refine these associations.

## Conclusion

The burden of urolithiasis in the NAME region has grown significantly over the past three decades, driven by rising incidence and prevalence rates. The condition remains a critical public health issue, particularly in middle-aged and older populations. While socioeconomic development associates with increased diagnosis and non-fatal burden, it does not necessarily mitigate the fatal outcomes of the disease. Policymakers and healthcare providers must prioritize awareness campaigns, early diagnosis, and prevention strategies tailored to regional needs. While improvements in socioeconomic conditions have led to enhanced healthcare infrastructure and increased disease detection, risk factors must also be controlled to ensure disease prevalence remains stable. Addressing modifiable risk factors such as dietary habits, hydration, and physical activity can substantially reduce the incidence of urolithiasis. Furthermore, enhancing access to specialized care and preventive services is crucial for managing the rising burden effectively. This study emphasizes the importance of regional analyses in understanding disease dynamics and guiding public health interventions.

## Supporting information

**S1 File. Underlying GBD 2021 data for all analyses.** Complete dataset of urolithiasis burden measures (incidence, prevalence, deaths, YLDs, YLLs, DALYs) for 21 North Africa and Middle East countries, 1990–2021. Includes all-age numbers, age-standardized rates, percent change, and uncertainty intervals, stratified by sex, age, and country. (CSV)

**S2 File. Percent change and temporal trends data.** Percent change (1990–2021) with 95% uncertainty intervals for all burden measures, by country, sex, and age-standardized status. Used to generate Figure 1 and Table 1. (CSV)

**S3 File. Temporal trends in all-age and age-standardized burden.** Annual estimates (1990–2021) of all-age numbers and age-standardized rates for all burden measures in the NAME region, by sex. Used to generate Figure 1. (CSV)

**S4 File. Age-standardized rates for map visualization.** Age-standardized rates (ASRs) of incidence, prevalence, deaths, YLDs, YLLs, and DALYs for all 21 NAME countries, 1990 and 2021, by sex. Used to generate Figures 2 and 3. (CSV)

**S5 File. Country rankings of age-standardized burden.** Full ranking data for all burden measures across NAME countries, 1990 and 2021, including point estimates and 95% uncertainty intervals. Used to generate Figure 3. (CSV)

**S6 File. Age-specific burden data, 1990 and 2021.** Complete age-stratified rates (per 100,000) for incidence, prevalence, deaths, YLDs, YLLs, and DALYs in the NAME region, by sex and 5-year age groups. Used to generate Figure 4. (CSV)

**S7 File. SDI-stratified burden data, 1990–2021.** Country-year level data for deaths and DALYs with corresponding Socio-demographic Index (SDI) values. Used to generate Figure 5. (CSV)

## Author contributions

**Conceptualization:** Ozra Tabatabaei-Malazy, Seyed Mohammad Kazem Aghamir.

**Formal analysis:** Ali Golestani.

**Visualization:** Ali Golestani.

**Writing – original draft:** Sina Golestani.

**Writing – review & editing:** Mohammad Taghi Talebian, Ali Golestani, Zeinab Ahadi, Ozra Tabatabaei-Malazy, Ziba Aghsaei Fard, Abdolreza Mohammadi, Bagher Larijani, Seyed Mohammad Kazem Aghamir.

## References

- Allam EAH. Urolithiasis unveiled: pathophysiology, stone dynamics, types, and inhibitory mechanisms: a review. *Afr J Urol.* 2024;30(1). <https://doi.org/10.1186/s12301-024-00436-z>
- Bartoletti R, Cai T, Mondaini N, Melone F, Travaglini F, Carini M. *Urologia Internationalis.* 2007;79(Suppl. 1):3–7.
- Zheng Z, Hu W, Ji C, Zhang X, Ding X, Zhou S, et al. A study of the difference in biochemical metabolism between patients with unilateral and bilateral upper urinary tract stones. *Sci Rep.* 2024;14(1):30154. <https://doi.org/10.1038/s41598-024-81454-3> PMID: [39627370](https://pubmed.ncbi.nlm.nih.gov/39627370/)
- Ferraro PM, Bargagli M, Trinchieri A, Gambaro G. Risk of kidney stones: influence of dietary factors, dietary patterns, and vegetarian–vegan diets. *Nutrients.* 2020;12(3).
- Drabišćák E, Dorko E, Vargovčák M, Velk Ľ, Rimárová K, Andraščíková Š, et al. Analysis of potential risk factors associated with urolithiasis. *Cent Eur J Public Health.* 2022;30(Supplement):S37–42. <https://doi.org/10.21101/cejph.a6812> PMID: [35841224](https://pubmed.ncbi.nlm.nih.gov/35841224/)
- Zhu S, Fan Y, Hu X, Shao M. Insights into risk factors for urolithiasis: a mendelian randomization study. *BMC Urol.* 2023;23(1):76. <https://doi.org/10.1186/s12894-023-01243-4> PMID: [37118729](https://pubmed.ncbi.nlm.nih.gov/37118729/)
- Baatiah NY, Alhazmi RB, Albathi FA, Albogami EG, Mohammedkhalil AK, Alsaywid BS. Urolithiasis: Prevalence, risk factors, and public awareness regarding dietary and lifestyle habits in Jeddah, Saudi Arabia in 2017. *Urol Ann.* 2020;12(1):57–62. [https://doi.org/10.4103/UA.UA\\_13\\_19](https://doi.org/10.4103/UA.UA_13_19) PMID: [32015619](https://pubmed.ncbi.nlm.nih.gov/32015619/)
- Li J, Zhao Y, Xiong Z, Yang G. Global, Regional, and National Incidence and Disability-Adjusted Life-Years for Urolithiasis in 195 Countries and Territories, 1990–2019: Results from the Global Burden of Disease Study 2019. *J Clin Med.* 2023;12(3):1048. <https://doi.org/10.3390/jcm12031048> PMID: [36769696](https://pubmed.ncbi.nlm.nih.gov/36769696/)
- Zhang L, Zhang X, Pu Y, Zhang Y, Fan J. Global, Regional, and National Burden of Urolithiasis from 1990 to 2019: A Systematic Analysis for the Global Burden of Disease Study 2019. *Clin Epidemiol.* 2022;14:971–83. <https://doi.org/10.2147/CLEP.S370591> PMID: [35996396](https://pubmed.ncbi.nlm.nih.gov/35996396/)
- Awedew AF, Han H, Berice BN, Dodge M, Schneider RD, Abbasi-Kangevari M. The global, regional, and national burden of urolithiasis in 204 countries and territories, 2000–2021: a systematic analysis for the Global Burden of Disease Study 2021. *eClinicalMedicine.* 2024;78.
- Borumandnia N, Fattahi P, Talebi A, Taheri M, Alvani MS, Balani MM, et al. Longitudinal trend of urolithiasis incidence rates among world countries during past decades. *BMC Urol.* 2023;23(1):166. <https://doi.org/10.1186/s12894-023-01336-0> PMID: [37845667](https://pubmed.ncbi.nlm.nih.gov/37845667/)

12. Alhakamy M, AlShoabi I, Abdo B, Abdullah M, Alzanen K, Albadani N, et al. Prevalence of urolithiasis in adults of the Eastern Mediterranean region: A systematic review and meta-analysis. *Urological Science*. 2025;36(4):176–84. <https://doi.org/10.1097/us9.0000000000000076>
13. Zhang Y, Long G, Ding B, Sun G, Ouyang W, Liu M. The impact of ambient temperature on the incidence of urolithiasis: a systematic review and meta-analysis. *Scandinavian Journal of Work, Environment & Health*. 2020;46(2):117–26.
14. Ntoumos A, Hadjinicolaou P, Zittis G, Proestos Y, Lelieveld J. Projected Air Temperature Extremes and Maximum Heat Conditions Over the Middle-East-North Africa (MENA) Region. *Earth Syst Environ*. 2022;6(2):343–59. <https://doi.org/10.1007/s41748-022-00297-y>
15. Powles J, Fahimi S, Micha R, Khatibzadeh S, Shi P, Ezzati M, et al. Global, regional and national sodium intakes in 1990 and 2010: a systematic analysis of 24 h urinary sodium excretion and dietary surveys worldwide. *BMJ Open*. 2013;3(12):e003733. <https://doi.org/10.1136/bmjopen-2013-003733> PMID: [24366578](https://pubmed.ncbi.nlm.nih.gov/24366578/)
16. Parivar F, Low RK, Stoller ML. The influence of diet on urinary stone disease. *J Urol*. 1996;155(2):432–40. [https://doi.org/10.1016/s0022-5347\(01\)66411-5](https://doi.org/10.1016/s0022-5347(01)66411-5) PMID: [8558629](https://pubmed.ncbi.nlm.nih.gov/8558629/)
17. Antonelli JA, Maalouf NM, Pearle MS, Lotan Y. Use of the National Health and Nutrition Examination Survey to calculate the impact of obesity and diabetes on cost and prevalence of urolithiasis in 2030. *Eur Urol*. 2014;66(4):724–9. <https://doi.org/10.1016/j.eururo.2014.06.036> PMID: [25015037](https://pubmed.ncbi.nlm.nih.gov/25015037/)
18. Lotan Y, Buendia Jiménez I, Lenoir-Wijnkoop I, Daudon M, Molinier L, Tack I, et al. Increased water intake as a prevention strategy for recurrent urolithiasis: major impact of compliance on cost-effectiveness. *J Urol*. 2013;189(3):935–9. <https://doi.org/10.1016/j.juro.2012.08.254> PMID: [23017509](https://pubmed.ncbi.nlm.nih.gov/23017509/)
19. Murray CJL. The Global Burden of Disease Study at 30 Years. *Nature Medicine*. 2022;28(10):2019–26.
20. Ward ZJ, Goldie SJ. Global Burden of Disease Study 2021 estimates: implications for health policy and research. *Lancet*. 2024;403(10440):1958–9. [https://doi.org/10.1016/S0140-6736\(24\)00812-2](https://doi.org/10.1016/S0140-6736(24)00812-2) PMID: [38642567](https://pubmed.ncbi.nlm.nih.gov/38642567/)
21. Lang J, Narendrula A, El-Zawahry A, Sindhvani P, Ekwenna O. Global Trends in Incidence and Burden of Urolithiasis from 1990 to 2019: An Analysis of Global Burden of Disease Study Data. *Eur Urol Open Sci*. 2022;35:37–46. <https://doi.org/10.1016/j.euro.2021.10.008> PMID: [35024630](https://pubmed.ncbi.nlm.nih.gov/35024630/)
22. Li S, Huang X, Liu J, Yue S, Hou X, Hu L, et al. Trends in the Incidence and DALYs of Urolithiasis From 1990 to 2019: Results From the Global Burden of Disease Study 2019. *Front Public Health*. 2022;10:825541. <https://doi.org/10.3389/fpubh.2022.825541> PMID: [35309229](https://pubmed.ncbi.nlm.nih.gov/35309229/)
23. Hu J, Zhang J, Shadike A, Wang J, Shi J, Lai C. Global, Regional, and National Burden of Urolithiasis, 1992–2021: Analysis of Data from the Global Burden of Disease Study 2021. 2023. <https://ssrn.com/abstract=4999141>
24. Zhu C, Wang D-Q, Zi H, Huang Q, Gu J-M, Li L-Y, et al. Epidemiological trends of urinary tract infections, urolithiasis and benign prostatic hyperplasia in 203 countries and territories from 1990 to 2019. *Mil Med Res*. 2021;8(1):64. <https://doi.org/10.1186/s40779-021-00359-8> PMID: [34879880](https://pubmed.ncbi.nlm.nih.gov/34879880/)
25. Ferrari AJ, Santomauro DF, Aali A, Abate YH, Abbafati C, Abbastabar H, et al. Global incidence, prevalence, years lived with disability (YLDs), disability-adjusted life-years (DALYs), and healthy life expectancy (HALE) for 371 diseases and injuries in 204 countries and territories and 811 subnational locations, 1990–2021: a systematic analysis for the Global Burden of Disease Study 2021. *The Lancet*. 2024;403(10440):2133–61.
26. Stevens GA, Alkema L, Black RE, Boerma JT, Collins GS, Ezzati M, et al. Guidelines for Accurate and Transparent Health Estimates Reporting: the GATHER statement. *Lancet*. 2016;388(10062):e19–23. [https://doi.org/10.1016/S0140-6736\(16\)30388-9](https://doi.org/10.1016/S0140-6736(16)30388-9) PMID: [27371184](https://pubmed.ncbi.nlm.nih.gov/27371184/)
27. Naghavi M, Ong KL, Aali A, Ababneh HS, Abate YH, Abbafati C, et al. Global burden of 288 causes of death and life expectancy decomposition in 204 countries and territories and 811 subnational locations, 1990–2021: a systematic analysis for the Global Burden of Disease Study 2021. *The Lancet*. 2024;403(10440):2100–32.
28. Raheem OA, Khandwala YS, Sur RL, Ghani KR, Denstedt JD. Burden of Urolithiasis: Trends in Prevalence, Treatments, and Costs. *Eur Urol Focus*. 2017;3(1):18–26. <https://doi.org/10.1016/j.euf.2017.04.001> PMID: [28720363](https://pubmed.ncbi.nlm.nih.gov/28720363/)
29. Qian X, Wan J, Xu J, Liu C, Zhong M, Zhang J, et al. Epidemiological Trends of Urolithiasis at the Global, Regional, and National Levels: A Population-Based Study. *Int J Clin Pract*. 2022;2022:6807203. <https://doi.org/10.1155/2022/6807203> PMID: [35685546](https://pubmed.ncbi.nlm.nih.gov/35685546/)
30. Li J, Zhao Y, Xiong Z, Yang G. Global, Regional, and National Incidence and Disability-Adjusted Life-Years for Urolithiasis in 195 Countries and Territories, 1990–2019: Results from the Global Burden of Disease Study 2019. *J Clin Med*. 2023;12(3):1048. <https://doi.org/10.3390/jcm12031048> PMID: [36769696](https://pubmed.ncbi.nlm.nih.gov/36769696/)
31. Alatab S, Pourmand G, El Howairis MEF, Buchholz N, Najafi I, Pourmand MR, et al. National Profiles of Urinary Calculi: a Comparison Between Developing and Developed Worlds. *Iran J Kidney Dis*. 2016;10(2):51–61. PMID: [26921745](https://pubmed.ncbi.nlm.nih.gov/26921745/)
32. Robertson WG. Stone formation in the Middle Eastern Gulf States: A review. *Arab J Urol*. 2012;10(3):265–72. <https://doi.org/10.1016/j.aju.2012.04.003> PMID: [26558035](https://pubmed.ncbi.nlm.nih.gov/26558035/)
33. Abyad A. Ageing in the Middle-East and North Africa: Demographic and health trends. *International Journal on Ageing in Developing Countries*. 2021;6(2):112–28.
34. Fahed AC, El-Hage-Sleiman A-KM, Farhat TI, Nemer GM. Diet, genetics, and disease: a focus on the middle East and north Africa region. *J Nutr Metab*. 2012;2012:109037. <https://doi.org/10.1155/2012/109037> PMID: [22536488](https://pubmed.ncbi.nlm.nih.gov/22536488/)
35. Waha K, Krummenauer L, Adams S, Aich V, Baarsch F, Coumou D, et al. Climate change impacts in the Middle East and Northern Africa (MENA) region and their implications for vulnerable population groups. *Reg Environ Change*. 2017;17(6):1623–38. <https://doi.org/10.1007/s10113-017-1144-2>

36. Watson G, Payne SR, Kunitsky K, Natchagande G, Mabedi C, Scotland KB. Stone disease in low- and middle-income countries: could augmented reality have a role in its management? *BJU Int.* 2022;130(4):400–7. <https://doi.org/10.1111/bju.15877> PMID: 35993671
37. García-Chávez CG, Rodríguez-Ramírez S, Rivera JA, Monterrubio-Flores E, Tucker KL. Sociodemographic factors are associated with dietary patterns in Mexican schoolchildren. *Public Health Nutr.* 2018;21(4):702–10. <https://doi.org/10.1017/S1368980017003299> PMID: 29191250
38. Sarica K. Obesity and stones. *Curr Opin Urol.* 2019;29(1):27–32. <https://doi.org/10.1097/MOU.0000000000000557> PMID: 30308572
39. Tae BS, Balpukov U, Cho SY, Jeong CW. Eleven-year Cumulative Incidence and Estimated Lifetime Prevalence of Urolithiasis in Korea: a National Health Insurance Service-National Sample Cohort Based Study. *J Korean Med Sci.* 2018;33(2):e13. <https://doi.org/10.3346/jkms.2018.33.e13> PMID: 29215822
40. Noori N, Honarkar E, Goldfarb DS, Kalantar-Zadeh K, Taheri M, Shakhssalim N, et al. Urinary lithogenic risk profile in recurrent stone formers with hyperoxaluria: a randomized controlled trial comparing DASH (Dietary Approaches to Stop Hypertension)-style and low-oxalate diets. *Am J Kidney Dis.* 2014;63(3):456–63. <https://doi.org/10.1053/j.ajkd.2013.11.022> PMID: 24560157
41. Jung JS, Han CH, Bae S. Study on the prevalence and incidence of urolithiasis in Korea over the last 10 years: An analysis of National Health Insurance Data. *Investig Clin Urol.* 2018;59(6):383–91. <https://doi.org/10.4111/icu.2018.59.6.383> PMID: 30402571
42. Daudon M, Doré J-C, Jungers P, Lacour B. Changes in stone composition according to age and gender of patients: a multivariate epidemiological approach. *Urol Res.* 2004;32(3):241–7. <https://doi.org/10.1007/s00240-004-0421-y> PMID: 15127165
43. Sorokin I, Mamoulakis C, Miyazawa K, Rodgers A, Talati J, Lotan Y. Epidemiology of stone disease across the world. *World J Urol.* 2017;35(9):1301–20. <https://doi.org/10.1007/s00345-017-2008-6> PMID: 28213860
44. Liu Y, Chen Y, Liao B, Luo D, Wang K, Li H, et al. Epidemiology of urolithiasis in Asia. *Asian J Urol.* 2018;5(4):205–14. <https://doi.org/10.1016/j.ajur.2018.08.007> PMID: 30364478
45. Yagisawa T, Ito F, Osaka Y, Amano H, Kobayashi C, Toma H. The influence of sex hormones on renal osteopontin expression and urinary constituents in experimental urolithiasis. *J Urol.* 2001;166(3):1078–82. [https://doi.org/10.1016/s0022-5347\(05\)65925-3](https://doi.org/10.1016/s0022-5347(05)65925-3) PMID: 11490302
46. Kaninia S, Stuart CM, Galea I. Dehydration associates with lower urinary tract symptoms in progressive multiple sclerosis. *Eur J Neurol.* 2024;31(3):e16175. <https://doi.org/10.1111/ene.16175> PMID: 38117533
47. Kale SS, Ghole VS, Pawar NJ, Jagtap DV. Inter-annual variability of urolithiasis epidemic from semi-arid part of Deccan Volcanic Province, India: climatic and hydrogeochemical perspectives. *Int J Environ Health Res.* 2014;24(3):278–89. <https://doi.org/10.1080/09603123.2013.818105> PMID: 23869912
48. Rodgers AL. Effect of mineral water containing calcium and magnesium on calcium oxalate urolithiasis risk factors. *Urol Int.* 1997;58(2):93–9. <https://doi.org/10.1159/000282958> PMID: 9096270
49. Lewandowski S, Rodgers AL. Idiopathic calcium oxalate urolithiasis: risk factors and conservative treatment. *Clin Chim Acta.* 2004;345(1–2):17–34. <https://doi.org/10.1016/j.cccn.2004.03.009> PMID: 15193974
50. Abbasi-Kangevari M, Malekpour M-R, Masinaei M, Moghaddam SS, Ghamari S-H, Abbasi-Kangevari Z, et al. Effect of air pollution on disease burden, mortality, and life expectancy in North Africa and the Middle East: a systematic analysis for the Global Burden of Disease Study 2019. *Lancet Planet Health.* 2023;7(5):e358–69. [https://doi.org/10.1016/S2542-5196\(23\)00053-0](https://doi.org/10.1016/S2542-5196(23)00053-0) PMID: 37164512
51. Gan X, Zhang Y, He P, Ye Z, Zhou C, Liu M, et al. Positive association between ambient air pollutants and incident kidney stones. *Environ Sci Pollut Res Int.* 2023;30(59):124067–77. <https://doi.org/10.1007/s11356-023-31136-w> PMID: 37996579
52. Hassan Emami M, Saberi F, Mohammadzadeh S, Fahim A, Abdolvand M, Ali Ehsan Dehkordi S, et al. A Review of Heavy Metals Accumulation in Red Meat and Meat Products in the Middle East. *J Food Prot.* 2023;86(3):100048. <https://doi.org/10.1016/j.jfp.2023.100048> PMID: 36916555
53. Liu Y, Zhang C, Qin Z, Yang Q, Lei J, Tang X, et al. Analysis of Threshold Effect of Urinary Heavy Metal Elements on the High Prevalence of Nephrolithiasis in Men. *Biol Trace Elem Res.* 2022;200(3):1078–88. <https://doi.org/10.1007/s12011-021-02740-z> PMID: 34263420
54. Chen Y-H, Wei C-F, Cheng Y-Y, Mita C, Hoang CLD, Lin C-K, et al. Urine cadmium and urolithiasis: A systematic review and meta-analysis. *Environ Res.* 2024;252(Pt 1):118745. <https://doi.org/10.1016/j.envres.2024.118745> PMID: 38527716
55. Levy FL, Adams-Huet B, Pak CY. Ambulatory evaluation of nephrolithiasis: an update of a 1980 protocol. *Am J Med.* 1995;98(1):50–9. [https://doi.org/10.1016/S0002-9343\(99\)80080-1](https://doi.org/10.1016/S0002-9343(99)80080-1) PMID: 7825619
56. Escribano J, Balaguer A, Roqué i Figuls M, Feliu A, Ferre N. Dietary interventions for preventing complications in idiopathic hypercalciuria. *Cochrane Database Syst Rev.* 2014;2014(2):CD006022. <https://doi.org/10.1002/14651858.CD006022.pub4> PMID: 24519664
57. Maalouf NM, Moe OW, Adams-Huet B, Sakhaee K. Hypercalciuria associated with high dietary protein intake is not due to acid load. *J Clin Endocrinol Metab.* 2011;96(12):3733–40. <https://doi.org/10.1210/jc.2011-1531> PMID: 21976719
58. Vezzoli G, Soldati L, Gambaro G. Update on primary hypercalciuria from a genetic perspective. *J Urol.* 2008;179(5):1676–82. <https://doi.org/10.1016/j.juro.2008.01.011> PMID: 18343451
59. Azizi F, Hadaegh F, Hosseinpanah F, Mirmiran P, Amouzegar A, Abdi H, et al. Metabolic health in the Middle East and north Africa. *Lancet Diabetes Endocrinol.* 2019;7(11):866–79. [https://doi.org/10.1016/S2213-8587\(19\)30179-2](https://doi.org/10.1016/S2213-8587(19)30179-2) PMID: 31422063
60. Shah A, Leslie S, Ramakrishnan S. Hyperoxaluria. *StatPearls.* 2024.
61. Leslie SW, Bashir K. Hypocitraturia and Renal Calculi. *StatPearls.* Treasure Island (FL): StatPearls Publishing. 2024.
62. Zeidan W, Taweel H, Shalash A, Husseini A. Consumption of fruits and vegetables among adolescents in Arab Countries: a systematic review. *Int J Behav Nutr Phys Act.* 2023;20(1):3. <https://doi.org/10.1186/s12966-022-01398-7> PMID: 36624455

63. Malekpour MR, Abbasi-Kangevari M, Ghamari SH, Khanali J, Heidari-Faroozan M, Moghaddam SS. The burden of metabolic risk factors in North Africa and the Middle East, 1990–2019: findings from the Global Burden of Disease Study. *EClinicalMedicine*. 2023;60.
64. Namazi N, Moghaddam SS, Esmaeili S, Peimani M, Tehrani YS, Bandarian F. Burden of type 2 diabetes mellitus and its risk factors in North Africa and the Middle East, 1990–2019: findings from the Global Burden of Disease study 2019. *BMC Public Health*. 2024;24(1):98.
65. Nikoloski Z, Williams G. Obesity in middle east. *Metabolic syndrome*. Springer. 2015:1–20.
66. Lubawy M, Formanowicz D. Insulin Resistance and Urolithiasis as a Challenge for a Dietitian. *Int J Environ Res Public Health*. 2022;19(12):7160. <https://doi.org/10.3390/ijerph19127160> PMID: 35742405
67. Miano R, Germani S, Vespasiani G. Stones and urinary tract infections. *Urol Int*. 2007;79 Suppl 1:32–6. <https://doi.org/10.1159/000104439> PMID: 17726350
68. Yoo MJ, Pelletier J, Koyfman A, Long B. High risk and low prevalence diseases: Infected urolithiasis. *Am J Emerg Med*. 2024;75:137–42. <https://doi.org/10.1016/j.ajem.2023.10.049> PMID: 37950981
69. Razi A, Ghiaei A, Dolatabadi FK, Haghghi R. Unraveling the association of bacteria and urinary stones in patients with urolithiasis: an update review article. *Front Med (Lausanne)*. 2024;11:1401808. <https://doi.org/10.3389/fmed.2024.1401808> PMID: 39281813
70. Lelieveld J, Proestos Y, Hadjinicolaou P, Tanarhte M, Tyrllis E, Zittis G. Strongly increasing heat extremes in the Middle East and North Africa (MENA) in the 21st century. *Climatic Change*. 2016;137(1–2):245–60. <https://doi.org/10.1007/s10584-016-1665-6>
71. Zhang Y, Long G, Ding B, Sun G, Ouyang W, Liu M, et al. The impact of ambient temperature on the incidence of urolithiasis: a systematic review and meta-analysis. *Scand J Work Environ Health*. 2020;46(2):117–26. <https://doi.org/10.5271/sjweh.3866> PMID: 31747456
72. Michel D, Pandya A, Hasnain SI, Sticklor R, Panuganti S, editors. Water challenges and cooperative response in the Middle East and North Africa. US-Islamic World Forum; 2012.
73. Federation ID. IDF diabetes atlas 2021. 2021.
74. Liu LH, Kang R, He J, Zhao SK, Li FT, Zhao ZG. Diabetes mellitus and the risk of urolithiasis: a meta-analysis of observational studies. *Urolithiasis*. 2015;43(4):293–301. <https://doi.org/10.1007/s00240-015-0773-5> PMID: 25894627
75. Daudon M, Jungers P. Diabetes and nephrolithiasis. *Curr Diab Rep*. 2007;7(6):443–8. <https://doi.org/10.1007/s11892-007-0075-6> PMID: 18255008
76. Bell DS. Inflammation, insulin resistance, infection, diabetes, and atherosclerosis. *Endocr Pract*. 2000;6(3):272–6. <https://doi.org/10.4158/EP.6.3.272> PMID: 11421545
77. Amiri F, Safiri S, Aletaha R, Sullman MJM, Hassanzadeh K, Kolahi A-A, et al. Epidemiology of urinary tract infections in the Middle East and North Africa, 1990–2021. *Trop Med Health*. 2025;53(1):16. <https://doi.org/10.1186/s41182-025-00692-x> PMID: 39910666
78. Tabaja H, Hindy JR, Kanj SS. Epidemiology of methicillin-resistant *Staphylococcus aureus* in Arab countries of the Middle East and North African (MENA) region. *Mediterranean Journal of Hematology and Infectious Diseases*. 2021;13(1):e2021050. <https://doi.org/10.4084/MJHID.2021.050>
79. Alaali Z, Bin Thani AS. Patterns of antimicrobial resistance observed in the Middle East: Environmental and health care retrospectives. *Sci Total Environ*. 2020;740:140089. <https://doi.org/10.1016/j.scitotenv.2020.140089> PMID: 32559543
